# Supplementary material
Source: PubMed Central journal article supplement (PMC3003344)

**Fig. S1**

**Supplementary Data**

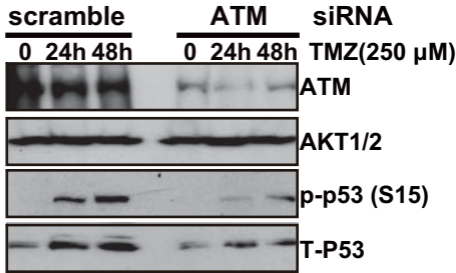

Supplement: supp_M110.164046_Fig._S1.pdf [file supp_M110.164046_Fig._S1.pdf]
